# Supplementary material
Source: PubMed Central journal article supplement (PMC6386679)
Supplement: pnas.1815966116.sapp.pdf [file pnas.1815966116.sapp.pdf]

## Supplementary Information for

### **Defining the impact of mutation accumulation on replicative lifespan in yeast using cancer-associated mutator phenotypes**

Mitchell B. Lee<sup>a</sup>, Ian T. Dowsett<sup>a,b</sup>, Daniel T. Carr<sup>a</sup>, Brian Wasko<sup>a</sup>, Sarah G. Stanton<sup>a</sup>, Michael S. Chung<sup>a</sup>, Niloufar Ghodsian<sup>a</sup>, Anna Bode<sup>a</sup>, Michael G. Kiflezghi<sup>a,b</sup>, Priya A. Uppal<sup>a</sup>, Katherine A. Grayden<sup>a</sup>, Yordanos C. Elala<sup>a</sup>, Thao T. Tang<sup>a</sup>, Ngoc H.B. Tran<sup>a</sup>, Thu H.B. Tran<sup>a</sup>, Anh B. Diep<sup>a</sup>, Michael Hope<sup>a</sup>, Daniel E. Promislow<sup>a,c</sup>, Scott R. Kennedy<sup>a</sup>, Matt Kaeberlein<sup>a</sup>, Alan J. Herr<sup>a,1</sup>

[alanherr@uw.edu](mailto:alanherr@uw.edu)

#### **This PDF file includes:**

Supplementary text  
Figs. S1 to S4  
Tables S1 to S2  
Captions for Datasets S1 to S2  
References for SI reference citations

#### **Other supplementary materials for this manuscript include the following:**

Datasets S1, S2

## Supplementary Text

### **S1. *The can1Δ/CAN1 genotype increases RLS.***

It has been previously shown that diploid cells in the BY4743 background live longer than isogenic haploid cells (BY4742 or BY4741) (1), and our data are consistent with this (BY4743 median RLS = 34.5, n = 660). We also observed that *CAN1* hemizygous strains (designated WT for our studies) were longer-lived than BY4743, the diploid background strain (Fig. S2 and S3) (WT median RLS = 39, n = 761; BY4743 median RLS = 34.5, n = 660,  $p < 0.001$ , Wilcoxon rank sum test), as has been previously reported for loss of *CAN1* in haploid yeast (2). Our data suggests that this longevity phenotype depends on gene dosage in diploids. Our strict use of *CAN1::natMX/can1Δ::HIS3* strains eliminates this potential source of variation in our aging measurements.

### **S2. *Variability in lifespans of strains with low mutation burdens.***

To estimate the mutation burden at the beginning of lifespan analysis, we sequenced three independent clones of mother cells isolated in an identical manner as those used in our lifespan cohorts. As controls, we sequenced the genomes of three independent isolates of the parental strains, AH2601 and AH2801. We found that AH2601 isolates shared nine clonal mutations that segregated in AH2601-derived strains. AH2801 isolates had no common mutations. Every AH2601 and AH2801 isolate also carried 5-13 unique variants, which evidently arose during the propagation of the strain. Unique mutations, such as these, were passed on to the haploid spores used for mating and contributed to the clonal mutation burdens in our diploid strains, along with any additional mutations that arose in the few haploid divisions prior to mating.

Clonal mutations affect all cells in all lifespan cohorts and will have the largest potential impact on survival demographics. Of course, mutations continually arise in our mutator lines at a rate determined by the mutator alleles. Subclonal variants arising during the initial propagation of the diploid strain were fixed by isolating single colonies from frozen stocks. These may influence lifespan of individual cohorts. Subclonal variants that arose after this single cell bottleneck will be largely private to individual cells within the cohort and likely generate greater variability within survival cohorts. However, the probability of deleterious mutations and synthetic interactions increases as a function of aggregate mutation burden. Thus, conceivably, there may be a level of mutation burden

where every cell carries private lifespan-limiting mutations, giving the appearance of a uniform effect across the entire population.

WT, *MSH6/msh6Δ*, *POL2/pol2-4*, and *POL2/pol2-4 MSH6/msh6Δ* strains derived from our mating experiments exhibited similar median lifespans, mutation rates, and mutation burdens as the WT parental strain (yML046) used to construct AH2601 and AH2801 (Table S1). Importantly, the WT strain derived from AH2601 (AH3251) contained all nine AH2601 mutations (six nonsynonymous changes), suggesting that none of these variants in the heterozygous state influence lifespan. Strains lacking Msh6 (*msh6Δ/msh6Δ*) or Polε proofreading (*pol2-4/pol2-4* and *pol2-4/pol2-4 MSH6/msh6Δ*) displayed a 10-fold increase in mutation rate relative to WT (Fig. S1B) and a fractional increase in mutation burden (Fig. S1C). Seven out of the nine isolates of these three genotypes displayed moderate declines in median lifespan even though deficiencies in Polε proofreading or Msh6 failed to reduce lifespan in haploids. The genotypes of the two strains with normal lifespans, yML262 (*msh6Δ/msh6Δ*) and yML268 (*pol2-4/pol2-4 MSH6/msh6Δ*) argues that reduction in RLS in the other strains derives from specific mutations rather than the *msh6Δ/msh6Δ* or *pol2-4/pol2-4* mutator genotypes, per se.

A review of the history of each strain and their genomic sequence supports the hypothesis that the lifespan reductions in many of these strains are due to passenger mutations inherited from the parental strain and not the mutator genotype. yML268 is derived from the same AH2801 culture from which we isolated long-lived WT (yML279), *MSH6/msh6Δ* (yML280, yML281), and *POL2/pol2-4 MSH6/msh6Δ* (yML267, yML271, and yML274) strains. A different AH2801 culture served as the source for short-lived *msh6Δ/msh6Δ* (yML337 and yML338), *pol2-4/pol2-4* (yML329 and yML332), and *pol2-4/pol2-4 MSH6/msh6Δ* strains (yML326). All of these related strains carried two nonsynonymous mutations (*yeI020c-A58V*, and *vid30-P18Q*). Deletion of *VID30* has been previously reported to reduce chronological lifespan (3, 4). Although the reductions in RLS observed in yML338, yML329, and yML332 were similar, yML337 and yML326 were even shorter-lived. yML337 carried two additional heterozygous nonsynonymous mutations while yML326 had a different set of five heterozygous nonsynonymous mutations. These additional mutations could lower lifespan in an additive fashion or potentially interact epistatically with *yeI020c-A58V* or *vid30-P18Q*. The remaining short-lived *pol2-4/pol2-4 MSH6/msh6Δ* strains (AH4703 and AH4713) came from a different AH2801 culture and shared two different heterozygous nonsynonymous mutations (*ade6-G445R* and *stt4-K1223N*) and one homozygous mutation (*bcp1-A4D*). Variation in

lifespan was also observed among the *POL3/pol3-01* strains (AH3203, AH3228, AH3240, and AH3241), which were all derived from the same AH2601 culture. One strain (AH3228) had a significantly shorter median lifespan than the others and carried three unique heterozygous nonsynonymous mutations (*hnm1-W372L*, *ypl068C-N98I*, *mms1-K861Q*). Taken together, these observations suggest that relatively small numbers of heterozygous mutations, acting alone or in combination, can reduce diploid yeast lifespan.

### **S3. Short-lifespans of *POL3/pol3-01 MSH6/msh6Δ* strains**

Clonal mutation did not explain reduced RLS in the six *POL3/pol3-01 MSH6/msh6Δ* strains. These strains exhibited similar mutation rates as the *POL3/pol3-01* strains. Some of these strains had higher clonal mutation burdens, which likely indicates that a WT and a strongly mutagenic *pol3-01 msh6Δ* spore were mated to generate those strains. All six strains were isolated from the same AH2601 culture. Two nonsynonymous mutations segregated among these strains, but neither variant was present in all six isolates. Reduced lifespan in *POL3/pol3-01 MSH6/msh6Δ* cells may be due to a shared mutation missed by our analysis, different clonal mutations specific to each strain, or the *POL3/pol3-01 MSH6/msh6Δ* genotype itself. The observation that AH2601 is short-lived (Fig.4) suggests that the genotype exerts an unexplained dominant negative effect on lifespan.

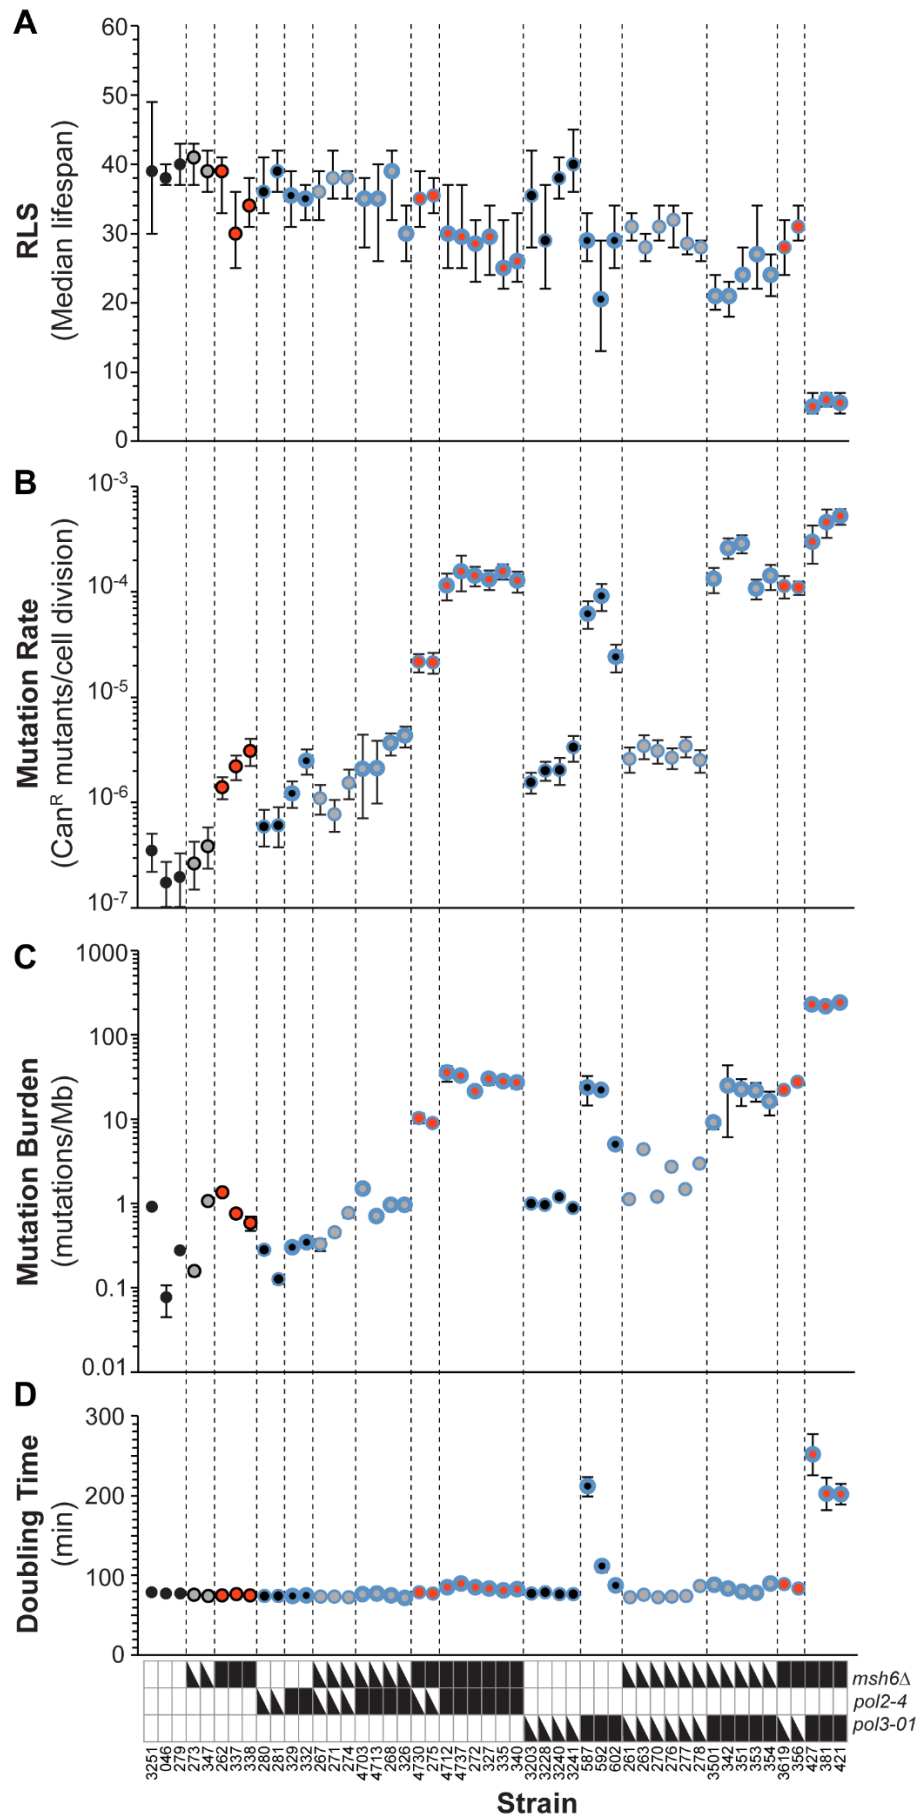

**Fig. S1.** Lifespan, mutation rates, and mutation burden of polymerase proofreading and/or mismatch repair defective diploid mutator yeast. Genotypes and strain identification numbers are represented schematically in the grid at the bottom: empty squares, homozygous WT allele; filled right triangle, heterozygous, mutator allele, filled squares, homozygous mutation. The fill color of the circles indicate MMR status: black, WT; gray, *MSH6/msh6Δ*; red, *msh6Δ/msh6Δ*. The color and thickness of the line around the circles indicate proofreading status: thin black line, WT; thin blue line, *POL3/pol3-01* or *POL2/pol2-4*; thick blue line, *pol3-01/pol3-01* or *pol2-4/pol2-4*. All data for these plots can be found in Dataset S1. A) Median RLS of diploid mutator strains separated by genotype. Error bars, 95% confidence intervals (CI). B) Mutation rates of diploid mutators. All strains were hemizygous for *CAN1* (*CAN1::natMX/can1Δ::HIS3*), which facilitated canavanine-resistance (Can<sup>R</sup>) mutation rate measurement. Error bars, 95% CI. Mutation rates compared to WT using the log-rank test; p-values were corrected for multiple testing ( $p < 0.001$  for all strains except *MSH6/msh6Δ*). C) Mutation burdens (SNVs/Mb) of diploid mutator yeast measured using whole-genome sequencing. Sequenced populations were age-matched to cells analyzed in RLS. Three independent isolates sequenced for each strain. Error bars, standard error of the mean (SEM). D) Peak doubling time (minutes/cell division). Error bars, SEM.

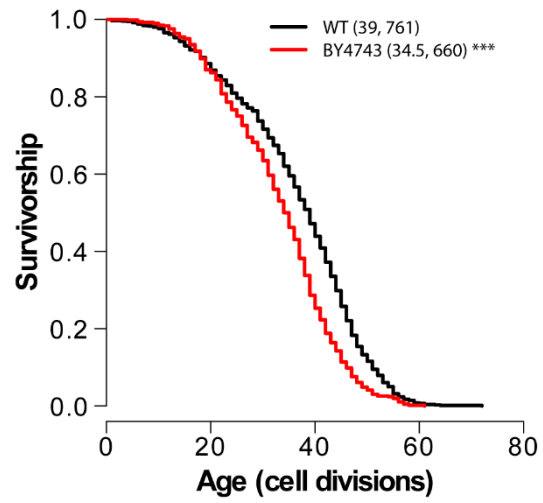

**Fig. S2.** RLS of AH0401 (WT) and BY4743 (median RLS and mother's dissected in parentheses). \*\*\* =  $p < 0.001$ , Wilcoxon rank sum test.

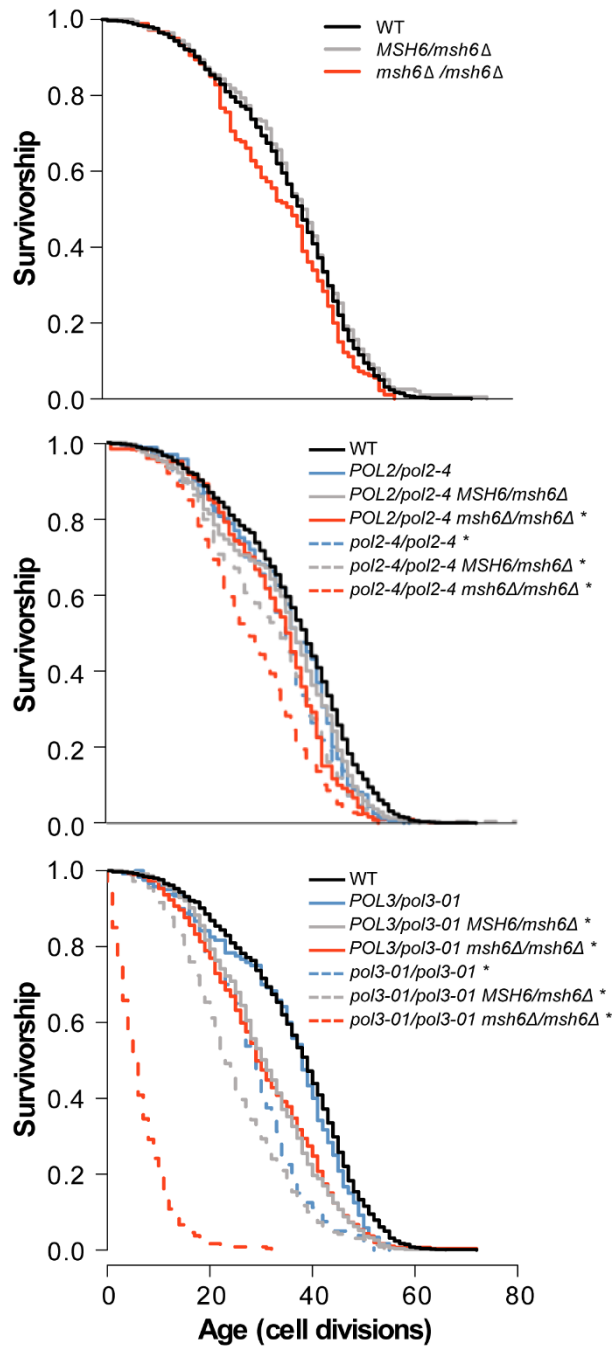

**Fig. S3.** RLS of diploid mismatch repair and polymerase proofreading deficient mutator strains. (A) *MSH6* deficient (*msh6Δ*) mutators. (B) Polε proofreading-deficient (*pol2-4*) strains with and without *MSH6*. (C) Polδ proofreading-deficient (*pol3-01*) strains with and without *MSH6*. \* =  $p < 0.05$ , Wilcoxon rank sum test, Bonferroni-corrected.



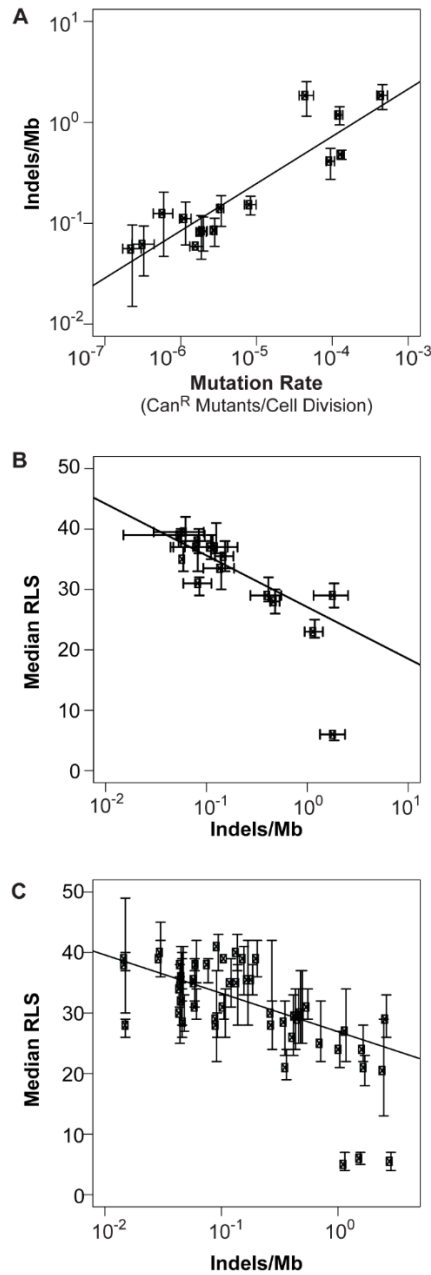

**Fig. S4.** Decreased lifespan negatively correlates with increased insertion/deletion mutations in diploid yeast. (A) Correlation between mutation rate and indels/Mb. Horizontal error bars = 95% CIs. Vertical error bars, SEM. Linear model adjusted R-squared = 0.80,  $p < 0.001$ . (B) Median RLS as a function of indels/Mb. Horizontal error bars, 95% CIs. Vertical error bars, SEM. Linear model adjusted R-squared = 0.70,  $p < 0.001$ . (C) Median RLS as a function of indels/Mb in diploid mutators. Instead of pooling on the basis of mutator genotype, individual mutator strains were plotted. Error bars, SEM. Linear model adjusted R-squared = 0.43,  $p < 0.001$ . For B and C, linear regression modeling was performed after excluding the outlying dattum (*pol3-01/pol3-01 msh6Δ/msh6Δ*).

**Table S1. Yeast strains.**

| Strain  | Parent Strain | Relevant genotype                                                                                                                                      | Source               |
|---------|---------------|--------------------------------------------------------------------------------------------------------------------------------------------------------|----------------------|
| AH0401  | BY4743        | <i>CAN1::natMX/can1Δ::HIS3</i>                                                                                                                         | Herr et al., 2014    |
| AH2601  | AH0401        | <i>CAN1::natMX/can1Δ::HIS3 MSH6/msh6Δ::LEU2</i><br><i>POL3/URA3::pol3-01</i>                                                                           | This study           |
| AH2801  | AH0401        | <i>CAN1::natMX/can1Δ::HIS3 MSH6/msh6Δ::LEU2</i><br><i>POL2/pol2-4::URA3</i>                                                                            | Kennedy et al., 2015 |
| AH3203  | AH2601        | <i>CAN1::natMX/can1Δ::HIS3 MSH6/MSH6</i><br><i>POL3/URA3::pol3-01</i>                                                                                  | This study           |
| AH3228  | AH2601        | <i>CAN1::natMX/can1Δ::HIS3 MSH6/MSH6</i><br><i>POL3/URA3::pol3-01</i>                                                                                  | This study           |
| AH3240  | AH2601        | <i>CAN1::natMX/can1Δ::HIS3 MSH6/MSH6</i><br><i>POL3/URA3::pol3-01</i>                                                                                  | This study           |
| AH3241  | AH2601        | <i>CAN1::natMX/can1Δ::HIS3 MSH6/MSH6</i><br><i>POL3/URA3::pol3-01</i>                                                                                  | This study           |
| AH3251  | AH2601        | <i>CAN1::natMX/can1Δ::HIS3 MSH6/MSH6 POL3/POL3</i><br><i>CAN1::natMX/can1Δ::HIS3 MSH6/msh6Δ::LEU2</i>                                                  | This study           |
| AH3501  | AH2601        | <i>URA3::pol3-01/URA3::pol3-01</i><br><i>CAN1::natMX/can1Δ::HIS3 msh6Δ::LEU2/msh6Δ::LEU2</i>                                                           | This study           |
| AH3619  | AH2601        | <i>POL3/URA3::pol3-01</i><br><i>CAN1::natMX/can1Δ::HIS3 MSH6/msh6Δ::LEU2 pol2-4::URA3/pol2-4::URA3</i>                                                 | This study           |
| AH4703  | AH2801        | <i>CAN1::natMX/can1Δ::HIS3 msh6Δ::LEU2/msh6Δ::LEU2</i><br><i>pol2-4::URA3/pol2-4::URA3</i>                                                             | This study           |
| AH4712  | AH2801        | <i>CAN1::natMX/can1Δ::HIS3 MSH6/msh6Δ::LEU2 pol2-4::URA3/pol2-4::URA3</i><br><i>CAN1::natMX/can1Δ::HIS3 MSH6/msh6Δ::LEU2 pol2-4::URA3/pol2-4::URA3</i> | This study           |
| AH4713  | AH2801        | <i>CAN1::natMX/can1Δ::HIS3 msh6Δ::LEU2/msh6Δ::LEU2</i><br><i>POL2/pol2-4::URA3</i>                                                                     | This study           |
| AH4730  | AH2801        | <i>CAN1::natMX/can1Δ::HIS3 msh6Δ::LEU2/msh6Δ::LEU2</i><br><i>pol2-4::URA3/pol2-4::URA3</i>                                                             | This study           |
| AH4737  | AH2801        | <i>CAN1::natMX/can1Δ::HIS3 msh6Δ::LEU2/msh6Δ::LEU2</i><br><i>pol2-4::URA3/pol2-4::URA3</i>                                                             | This study           |
| yML033* | AH0401        | MA1, <i>CAN1::natMX/can1Δ::HIS3</i>                                                                                                                    | This study           |
| yML034* | AH0401        | MA2, <i>CAN1::natMX/can1Δ::HIS3</i>                                                                                                                    | This study           |
| yML036* | AH0401        | MA7, <i>CAN1::natMX/can1Δ::HIS3</i>                                                                                                                    | This study           |
| yML037* | AH0401        | MA9, <i>CAN1::natMX/can1Δ::HIS3</i>                                                                                                                    | This study           |
| yML038* | AH0401        | MA4, <i>CAN1::natMX/can1Δ::HIS3</i>                                                                                                                    | This study           |
| yML039* | AH0401        | MA6, <i>CAN1::natMX/can1Δ::HIS3</i>                                                                                                                    | This study           |
| yML040* | AH0401        | MA10, <i>CAN1::natMX/can1Δ::HIS3</i>                                                                                                                   | This study           |
| yML041* | AH0401        | MA5, <i>CAN1::natMX/can1Δ::HIS3</i>                                                                                                                    | This study           |
| yML042* | AH0401        | MA11, <i>CAN1::natMX/can1Δ::HIS3</i>                                                                                                                   | This study           |
| yML043* | AH0401        | MA8, <i>CAN1::natMX/can1Δ::HIS3</i>                                                                                                                    | This study           |
| yML044* | AH0401        | MA3, <i>CAN1::natMX/can1Δ::HIS3</i>                                                                                                                    | This study           |
| yML261  | AH2601        | <i>CAN1::natMX/can1Δ::HIS3 MSH6/msh6Δ::LEU2</i><br><i>POL3/URA3::pol3-01</i>                                                                           | This study           |
| yML262  | AH2601        | <i>CAN1::natMX/can1Δ::HIS3 msh6Δ::LEU2/msh6Δ::LEU2</i><br><i>POL3/POL3</i>                                                                             | This study           |
| yML263  | AH2601        | <i>CAN1::natMX/can1Δ::HIS3 MSH6/msh6Δ::LEU2</i><br><i>POL3/URA3::pol3-01</i>                                                                           | This study           |
| yML267  | AH2801        | <i>CAN1::natMX/can1Δ::HIS3 MSH6/msh6Δ::LEU2</i><br><i>POL2/pol2-4::URA3</i>                                                                            | This study           |
| yML268  | AH2801        | <i>CAN1::natMX/can1Δ::HIS3 MSH6/msh6Δ::LEU2 pol2-4::URA3/pol2-4::URA3</i><br><i>CAN1::natMX/can1Δ::HIS3 MSH6/msh6Δ::LEU2</i>                           | This study           |
| yML270  | AH2601        | <i>POL3/URA3::pol3-01</i><br><i>CAN1::natMX/can1Δ::HIS3 MSH6/msh6Δ::LEU2</i>                                                                           | This study           |
| yML271  | AH2801        | <i>POL2/pol2-4::URA3</i><br><i>CAN1::natMX/can1Δ::HIS3 msh6Δ::LEU2/msh6Δ::LEU2</i>                                                                     | This study           |
| yML272  | AH2801        | <i>pol2-4::URA3/pol2-4::URA3</i><br><i>CAN1::natMX/can1Δ::HIS3 MSH6/msh6Δ::LEU2</i>                                                                    | This study           |
| yML273  | AH2801        | <i>POL2/POL2</i><br><i>CAN1::natMX/can1Δ::HIS3 MSH6/msh6Δ::LEU2</i>                                                                                    | This study           |
| yML274  | AH2801        | <i>CAN1::natMX/can1Δ::HIS3 MSH6/msh6Δ::LEU2</i><br><i>POL2/pol2-4::URA3</i>                                                                            | This study           |

|        |        |                                                                                |            |
|--------|--------|--------------------------------------------------------------------------------|------------|
| yML275 | AH2801 | CAN1::natMX/can1Δ::HIS3 msh6Δ::LEU2/msh6Δ::LEU2<br>POL2/pol2-4::URA3           | This study |
| yML276 | AH2601 | CAN1::natMX/can1Δ::HIS3 MSH6/msh6Δ::LEU2<br>POL3/URA3::pol3-01                 | This study |
| yML277 | AH2601 | CAN1::natMX/can1Δ::HIS3 MSH6/msh6Δ::LEU2<br>POL3/URA3::pol3-01                 | This study |
| yML278 | AH2601 | CAN1::natMX/can1Δ::HIS3 MSH6/msh6Δ::LEU2<br>POL3/URA3::pol3-01                 | This study |
| yML279 | AH2801 | CAN1::natMX/can1Δ::HIS3 MSH6/MSH6 POL2/POL2                                    | This study |
| yML280 | AH2801 | CAN1::natMX/can1Δ::HIS3 MSH6/MSH6 POL2/pol2-4::URA3                            | This study |
| yML281 | AH2801 | CAN1::natMX/can1Δ::HIS3 MSH6/MSH6 POL2/pol2-4::URA3                            | This study |
| yML326 | AH2801 | CAN1::natMX/can1Δ::HIS3 MSH6/msh6Δ::LEU2 pol2-4::URA3/pol2-4::URA3             | This study |
| yML327 | AH2801 | CAN1::natMX/can1Δ::HIS3 msh6Δ::LEU2/msh6Δ::LEU2<br>pol2-4::URA3/pol2-4::URA3   | This study |
| yML329 | AH2801 | CAN1::natMX/can1Δ::HIS3 MSH6/MSH6 pol2-4::URA3/pol2-4::URA3                    | This study |
| yML332 | AH2801 | CAN1::natMX/can1Δ::HIS3 MSH6/MSH6 pol2-4::URA3/pol2-4::URA3                    | This study |
| yML335 | AH2801 | CAN1::natMX/can1Δ::HIS3 msh6Δ::LEU2/msh6Δ::LEU2<br>pol2-4::URA3/pol2-4::URA3   | This study |
| yML337 | AH2801 | CAN1::natMX/can1Δ::HIS3 msh6Δ::LEU2/msh6Δ::LEU2<br>POL2/POL2                   | This study |
| yML338 | AH2801 | CAN1::natMX/can1Δ::HIS3 msh6Δ::LEU2/msh6Δ::LEU2<br>POL2/POL2                   | This study |
| yML340 | AH2801 | CAN1::natMX/can1Δ::HIS3 msh6Δ::LEU2/msh6Δ::LEU2<br>pol2-4::URA3/pol2-4::URA3   | This study |
| yML342 | AH2601 | CAN1::natMX/can1Δ::HIS3 MSH6/msh6Δ::LEU2<br>URA3::pol3-01/URA3::pol3-01        | This study |
| yML347 | AH2601 | CAN1::natMX/can1Δ::HIS3 MSH6/msh6Δ::LEU2<br>POL3/POL3                          | This study |
| yML351 | AH2601 | CAN1::natMX/can1Δ::HIS3 MSH6/msh6Δ::LEU2<br>URA3::pol3-01/URA3::pol3-01        | This study |
| yML353 | AH2601 | CAN1::natMX/can1Δ::HIS3 MSH6/msh6Δ::LEU2<br>URA3::pol3-01/URA3::pol3-01        | This study |
| yML354 | AH2601 | CAN1::natMX/can1Δ::HIS3 MSH6/msh6Δ::LEU2<br>URA3::pol3-01/URA3::pol3-01        | This study |
| yML356 | AH2601 | CAN1::natMX/can1Δ::HIS3 msh6Δ::LEU2/msh6Δ::LEU2<br>POL3/URA3::pol3-01          | This study |
| yML381 | AH2601 | CAN1::natMX/can1Δ::HIS3 msh6Δ::LEU2/msh6Δ::LEU2<br>URA3::pol3-01/URA3::pol3-01 | This study |
| yML421 | AH2601 | CAN1::natMX/can1Δ::HIS3 msh6Δ::LEU2/msh6Δ::LEU2<br>URA3::pol3-01/URA3::pol3-01 | This study |
| yML427 | AH2601 | CAN1::natMX/can1Δ::HIS3 msh6Δ::LEU2/msh6Δ::LEU2<br>URA3::pol3-01/URA3::pol3-01 | This study |
| yML587 | AH2601 | CAN1::natMX/can1Δ::HIS3 MSH6/MSH6 URA3::pol3-01/URA3::pol3-01                  | This study |
| yML592 | AH2601 | CAN1::natMX/can1Δ::HIS3 MSH6/MSH6 URA3::pol3-01/URA3::pol3-01                  | This study |
| yML602 | AH2601 | CAN1::natMX/can1Δ::HIS3 MSH6/MSH6 URA3::pol3-01/URA3::pol3-01                  | This study |

\* = mutation accumulation line

**Table S2. Primers.**

| <b>Primer Name</b>                        | <b>Sequence</b>                                                            |
|-------------------------------------------|----------------------------------------------------------------------------|
| <b>AH2601 Strain Construction</b>         |                                                                            |
| MSH6GU                                    | TTAATTGGAGCAACTAGTTAATTTTGACAAAGCCAATTTGAACTCCAAAAGATTGTACT<br>GAGAGTGAC   |
| MSH6GD                                    | ACTTTAAAAAAATAGTAAAAATCTTACATACATCGTAAATGAAAATACCTGTGCGGTA<br>TTTCACACCG   |
| POL3U                                     | ATATTGAGCACTTGCTATTAAGCATTAACTTTTATACATATACGCACAGCAAGATTGTAC<br>TGAGAGTGAC |
| pldr6                                     | AAACCACAACGGCATCGTGC                                                       |
| <b>Genotyping Assays</b>                  |                                                                            |
| pol2-4U                                   | CCTTCTTTGCTAACAGATAAGATTT                                                  |
| pol2-S5                                   | ATAACTCTCAGGGGACAAGTATAT                                                   |
| msh6-upstream                             | CCTTCTTTGCTAACAGATAAGATTT                                                  |
| msh6-downstream                           | CAGCTATTAATGTTCAACTTATTCC                                                  |
| <b>Illumina Adapter Primers</b>           |                                                                            |
| MWS51                                     | AATGATACGGCGACCACCGAGATCTACACTCTTTCCCTACACGACGCTCTCCGATCT                  |
| MWS55                                     | 5'/Phos/GATCGGAAGAGCACACGTCTGAACTCCAGTCAC                                  |
| <b>Illumina I5 index primers for QPCR</b> |                                                                            |
| P5                                        | AATGATACGGCGACCACCGAGATCTACAC                                              |
| I5index1                                  | AATGATACGGCGACCACCGAGATCTACACTATAGCCTACACTCTTTCCCTACACGACG                 |
| I5index2                                  | AATGATACGGCGACCACCGAGATCTACACATAGAGGCACACTCTTTCCCTACACGACG                 |
| I5index3                                  | AATGATACGGCGACCACCGAGATCTACACCCTATCCTACACTCTTTCCCTACACGACG                 |
| I5index4                                  | AATGATACGGCGACCACCGAGATCTACACGGCTCTGAACACTCTTTCCCTACACGACG                 |
| I5index5                                  | AATGATACGGCGACCACCGAGATCTACACAGGCGAAGACACTCTTTCCCTACACGACG                 |
| I5index6                                  | AATGATACGGCGACCACCGAGATCTACACTAATCTTAACACTCTTTCCCTACACGACG                 |
| <b>Illumina I7 Index Primers for QPCR</b> |                                                                            |
| I7index1                                  | CAAGCAGAAGACGGCATAACGAGATACAAGCTGTGACTGGAGTTCAGACGTGTGC                    |
| I7index2                                  | CAAGCAGAAGACGGCATAACGAGATAAACATCGTGACTGGAGTTCAGACGTGTGC                    |
| I7index3                                  | CAAGCAGAAGACGGCATAACGAGATACATTGGGTGACTGGAGTTCAGACGTGTGC                    |
| I7index4                                  | CAAGCAGAAGACGGCATAACGAGATACCACTGGTGACTGGAGTTCAGACGTGTGC                    |
| I7index5                                  | CAAGCAGAAGACGGCATAACGAGATAACGTGAGTGACTGGAGTTCAGACGTGTGC                    |
| I7index6                                  | CAAGCAGAAGACGGCATAACGAGATCGCTGATGTGACTGGAGTTCAGACGTGTGC                    |
| I7index7                                  | CAAGCAGAAGACGGCATAACGAGATCAGATCTGTGACTGGAGTTCAGACGTGTGC                    |

I7index8 CAAGCAGAAGACGGCATAACGAGATATGCCTAGTGACTGGAGTTCAGACGTGTGC  
I7index9 CAAGCAGAAGACGGCATAACGAGATCTGTAGCGTGACTGGAGTTCAGACGTGTGC  
I7index10 CAAGCAGAAGACGGCATAACGAGATAGTACAAGTGACTGGAGTTCAGACGTGTGC  
I7index11 CAAGCAGAAGACGGCATAACGAGATCATCAAGGTGACTGGAGTTCAGACGTGTGC  
I7index12 CAAGCAGAAGACGGCATAACGAGATAGTGGTCGTGACTGGAGTTCAGACGTGTGC  
I7index13 CAAGCAGAAGACGGCATAACGAGATAACAACCGTGACTGGAGTTCAGACGTGTGC  
I7index14 CAAGCAGAAGACGGCATAACGAGATAACCGAGGTGACTGGAGTTCAGACGTGTGC  
I7index15 CAAGCAGAAGACGGCATAACGAGATAACGCTTGTGACTGGAGTTCAGACGTGTGC  
I7index16 CAAGCAGAAGACGGCATAACGAGATAAGACGGGTGACTGGAGTTCAGACGTGTGC  
I7index17 CAAGCAGAAGACGGCATAACGAGATAAGGTACGTGACTGGAGTTCAGACGTGTGC  
I7index18 CAAGCAGAAGACGGCATAACGAGATACACAGAGTGACTGGAGTTCAGACGTGTGC  
I7index19 CAAGCAGAAGACGGCATAACGAGATACAGCAGGTGACTGGAGTTCAGACGTGTGC  
I7index20 CAAGCAGAAGACGGCATAACGAGATACCTCCAGTGACTGGAGTTCAGACGTGTGC  
I7index21 CAAGCAGAAGACGGCATAACGAGATACGCTCGGTGACTGGAGTTCAGACGTGTGC  
I7index22 CAAGCAGAAGACGGCATAACGAGATACGTATCGTGACTGGAGTTCAGACGTGTGC  
I7index23 CAAGCAGAAGACGGCATAACGAGATACTATGCGTGACTGGAGTTCAGACGTGTGC  
I7index24 CAAGCAGAAGACGGCATAACGAGATAGAGTCAGTGACTGGAGTTCAGACGTGTGC  
I7index25 CAAGCAGAAGACGGCATAACGAGATAGATCGCGTGACTGGAGTTCAGACGTGTGC  
I7index26 CAAGCAGAAGACGGCATAACGAGATAGCAGGAGTGACTGGAGTTCAGACGTGTGC  
I7index27 CAAGCAGAAGACGGCATAACGAGATAGTCACTGTGACTGGAGTTCAGACGTGTGC  
I7index28 CAAGCAGAAGACGGCATAACGAGATATCCTGTGTGACTGGAGTTCAGACGTGTGC  
I7index29 CAAGCAGAAGACGGCATAACGAGATATTGAGGGTGACTGGAGTTCAGACGTGTGC  
I7index30 CAAGCAGAAGACGGCATAACGAGATCAACCACGTGACTGGAGTTCAGACGTGTGC  
I7index31 CAAGCAGAAGACGGCATAACGAGATCAAGACTGTGACTGGAGTTCAGACGTGTGC  
I7index32 CAAGCAGAAGACGGCATAACGAGATCAATGGAGTGACTGGAGTTCAGACGTGTGC  
I7index33 CAAGCAGAAGACGGCATAACGAGATCACTTCGGTGACTGGAGTTCAGACGTGTGC  
I7index34 CAAGCAGAAGACGGCATAACGAGATCAGCGTTGTGACTGGAGTTCAGACGTGTGC  
I7index35 CAAGCAGAAGACGGCATAACGAGATCATAACCAGTGACTGGAGTTCAGACGTGTGC  
I7index36 CAAGCAGAAGACGGCATAACGAGATCCAGTTCGTGACTGGAGTTCAGACGTGTGC  
I7index37 CAAGCAGAAGACGGCATAACGAGATCCGAAGTGTGACTGGAGTTCAGACGTGTGC

I7index38 CAAGCAGAAGACGGCATAACGAGATCCGTGAGGTGACTGGAGTTCAGACGTGTGC  
I7index39 CAAGCAGAAGACGGCATAACGAGATCCTCCTGGTGACTGGAGTTCAGACGTGTGC  
I7index40 CAAGCAGAAGACGGCATAACGAGATCGAACTTGTGACTGGAGTTCAGACGTGTGC  
I7index41 CAAGCAGAAGACGGCATAACGAGATCGACTGGGTGACTGGAGTTCAGACGTGTGC  
I7index42 CAAGCAGAAGACGGCATAACGAGATCGCATACGTGACTGGAGTTCAGACGTGTGC  
I7index43 CAAGCAGAAGACGGCATAACGAGATCTCAATGGTGACTGGAGTTCAGACGTGTGC  
I7index44 CAAGCAGAAGACGGCATAACGAGATCTGAGCCGTGACTGGAGTTCAGACGTGTGC  
I7index45 CAAGCAGAAGACGGCATAACGAGATCTGGCATGTGACTGGAGTTCAGACGTGTGC  
I7index46 CAAGCAGAAGACGGCATAACGAGATGAATCTGGTGACTGGAGTTCAGACGTGTGC  
I7index47 CAAGCAGAAGACGGCATAACGAGATGACTAGTGTGACTGGAGTTCAGACGTGTGC  
I7index48 CAAGCAGAAGACGGCATAACGAGATGAGCTGAGTGACTGGAGTTCAGACGTGTGC  
I7index49 CAAGCAGAAGACGGCATAACGAGATGATAGACGTGACTGGAGTTCAGACGTGTGC  
I7index50 CAAGCAGAAGACGGCATAACGAGATGCCACATGTGACTGGAGTTCAGACGTGTGC  
I7index51 CAAGCAGAAGACGGCATAACGAGATGCGAGTAGTGACTGGAGTTCAGACGTGTGC  
I7index52 CAAGCAGAAGACGGCATAACGAGATGCTAACGGTGACTGGAGTTCAGACGTGTGC  
I7index53 CAAGCAGAAGACGGCATAACGAGATGCTCGGTGTGACTGGAGTTCAGACGTGTGC  
I7index54 CAAGCAGAAGACGGCATAACGAGATGGAGAACGTGACTGGAGTTCAGACGTGTGC  
I7index55 CAAGCAGAAGACGGCATAACGAGATGGTGCGAGTGACTGGAGTTCAGACGTGTGC  
I7index56 CAAGCAGAAGACGGCATAACGAGATGTACGCAGTGACTGGAGTTCAGACGTGTGC  
I7index57 CAAGCAGAAGACGGCATAACGAGATGTCGTAGGTGACTGGAGTTCAGACGTGTGC  
I7index58 CAAGCAGAAGACGGCATAACGAGATGTCTGTCTGACTGGAGTTCAGACGTGTGC  
I7index59 CAAGCAGAAGACGGCATAACGAGATGTGTTCTGTGACTGGAGTTCAGACGTGTGC  
I7index60 CAAGCAGAAGACGGCATAACGAGATTAGGATGGTGACTGGAGTTCAGACGTGTGC  
I7index61 CAAGCAGAAGACGGCATAACGAGATTATCAGCGTGACTGGAGTTCAGACGTGTGC  
I7index62 CAAGCAGAAGACGGCATAACGAGATTCCGTCTGTGACTGGAGTTCAGACGTGTGC  
I7index63 CAAGCAGAAGACGGCATAACGAGATTCTTACGTGACTGGAGTTCAGACGTGTGC  
I7index64 CAAGCAGAAGACGGCATAACGAGATTGAAGAGGTGACTGGAGTTCAGACGTGTGC  
I7index65 CAAGCAGAAGACGGCATAACGAGATTGGAACAGTGACTGGAGTTCAGACGTGTGC  
I7index66 CAAGCAGAAGACGGCATAACGAGATTGGCTTCGTGACTGGAGTTCAGACGTGTGC  
I7index67 CAAGCAGAAGACGGCATAACGAGATTGGTGGTGTGACTGGAGTTCAGACGTGTGC

|           |                                                         |
|-----------|---------------------------------------------------------|
| I7index68 | CAAGCAGAAGACGGCATAACGAGATTTACGCGTGACTGGAGTTCAGACGTGTGC  |
| I7index69 | CAAGCAGAAGACGGCATAACGAGATAACTCACGTGACTGGAGTTCAGACGTGTGC |
| I7index70 | CAAGCAGAAGACGGCATAACGAGATAAGAGATGTGACTGGAGTTCAGACGTGTGC |

### **Dataset S1**

Median replicative lifespans, mutation rates, mutation burdens, and doubling times of diploid strains.

### **Dataset S2**

Whole genome sequencing of diploid strains.

### **References**

1. Kaeberlein M, Kirkland KT, Fields S, & Kennedy BK (2005) Genes determining yeast replicative life span in a long-lived genetic background. *Mech Ageing Dev* 126(4):491-504.
2. Beaupere C, *et al.* (2017) CAN1 Arginine Permease Deficiency Extends Yeast Replicative Lifespan via Translational Activation of Stress Response Genes. *Cell reports* 18(8):1884-1892.
3. Burtner CR, Murakami CJ, Olsen B, Kennedy BK, & Kaeberlein M (2011) A genomic analysis of chronological longevity factors in budding yeast. *Cell Cycle* 10(9):1385-1396.
4. Marek A & Korona R (2013) Restricted pleiotropy facilitates mutational erosion of major life-history traits. *Evolution* 67(11):3077-3086.
